# Supplementary material for: ICAM-1 targeted and ROS-responsive nanoparticles for the treatment of acute lung injury
Source: Royal Society of Chemistry journal article supplement (doi:10.1039/d3nr04401g), 2023-12-29
Supplement: d3nr04401g1.pdf [file d3nr04401g1.pdf]

### Supporting Information

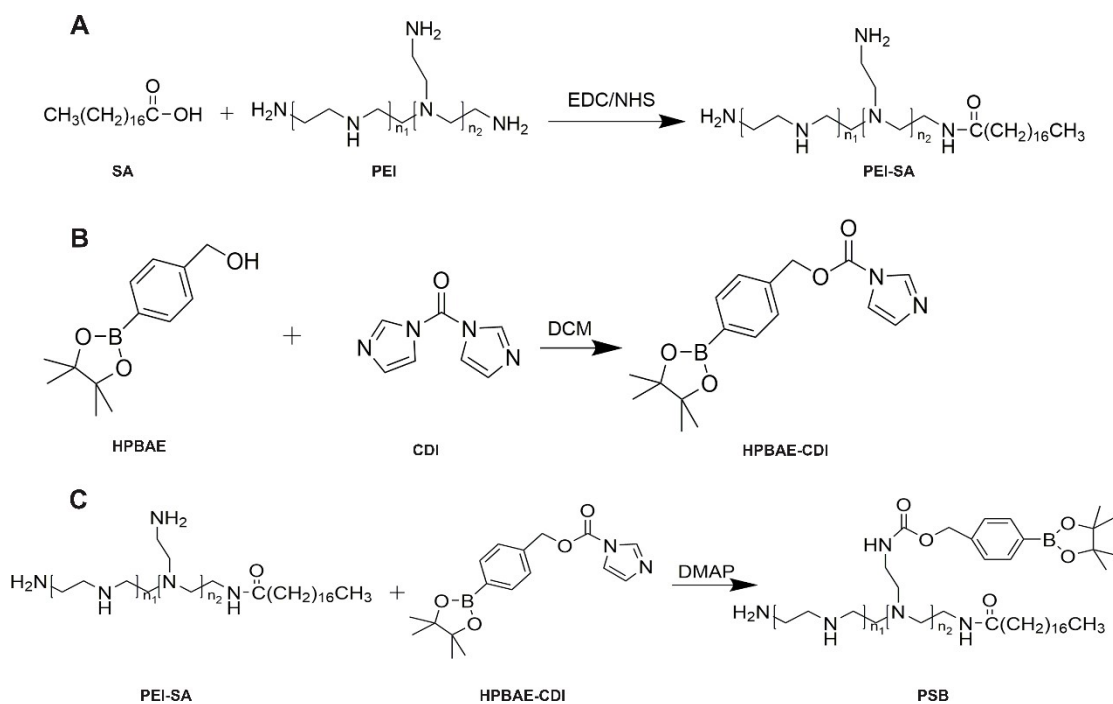

**Scheme S1.** The synthesis routes of (A) PEI-SA, (B) HPBAE-CDI, and (C) PSB.

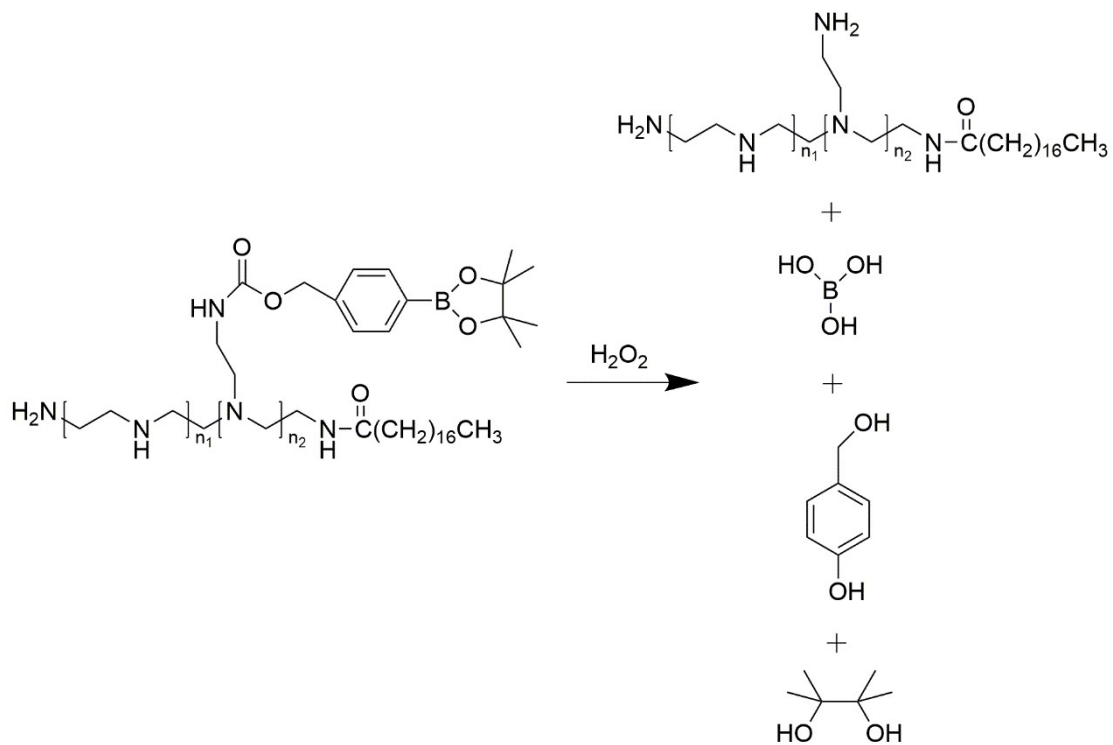

**Scheme S2.** Schematic diagram of PSB response to  $\text{H}_2\text{O}_2$  cleavage.

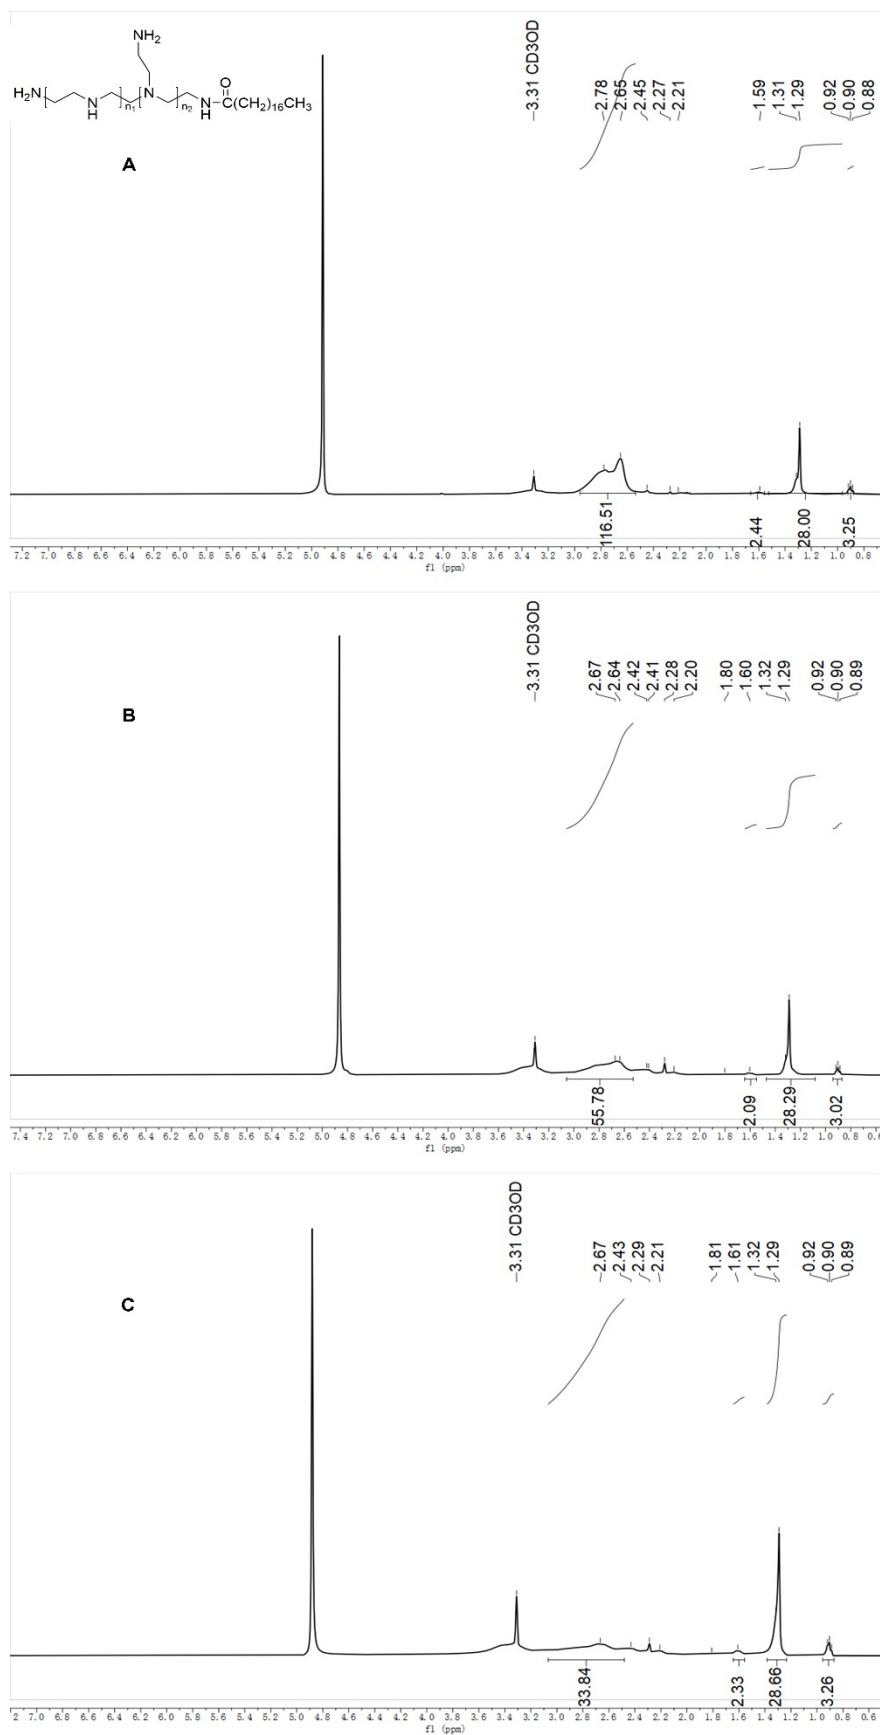

**Figure S1.**  $^1\text{H-NMR}$  spectra (MeOD- $d_4$ , 400MHz) of PSB at PEI/SA molar ratios of

(A) 1.5:1, (B) 1:3, and (C) 1:4.

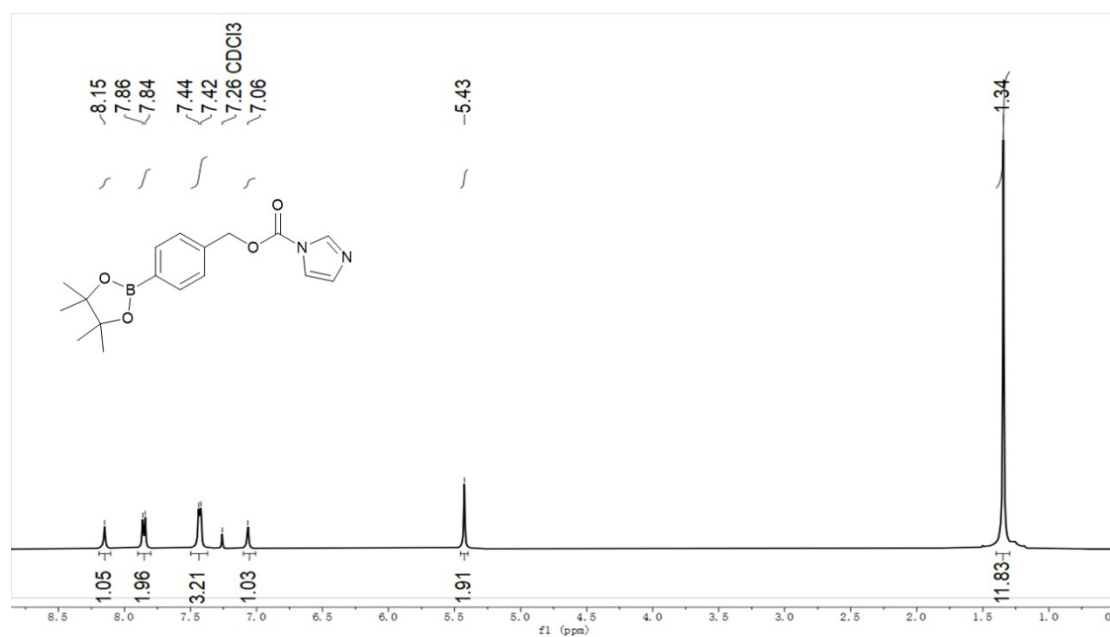

**Figure S2.** <sup>1</sup>H-NMR spectra (CDCl<sub>3</sub>, 400MHz) of HPBAE-CDI.

**Table S1.** Characterization of Dex/PSB NPs prepared with different Dex/material mass ratio.

| Dex/PSB(m/m) | Size (nm)   | PDI         | ζ potential  | EE (%)       | DL (%)       |
|--------------|-------------|-------------|--------------|--------------|--------------|
| 1/5          | 123.7 ± 5.1 | 0.22 ± 0.02 | 29.27 ± 0.64 | 67.09 ± 1.18 | 11.18 ± 0.20 |
| 1/10         | 138.7 ± 3.0 | 0.20 ± 0.02 | 29.23 ± 0.29 | 77.45 ± 0.17 | 7.04 ± 0.01  |
| 1/15         | 110.2 ± 2.1 | 0.25 ± 0.04 | 28.07 ± 1.94 | 62.43 ± 0.81 | 3.97 ± 0.05  |
| 1/20         | 169.5 ± 7.9 | 0.25 ± 0.01 | 29.03 ± 0.73 | 68.57 ± 3.37 | 3.26 ± 0.16  |

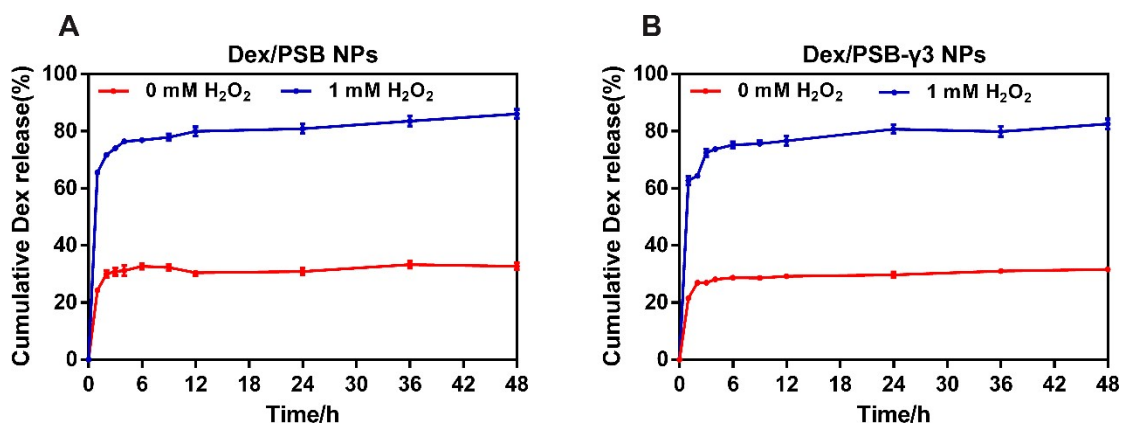

**Figure S3.** In vitro release curves of (A) Dex/PSB NPs, (B) Dex/PSB- $\gamma$ 3 NPs incubated with H<sub>2</sub>O<sub>2</sub> (0, 1 mM).

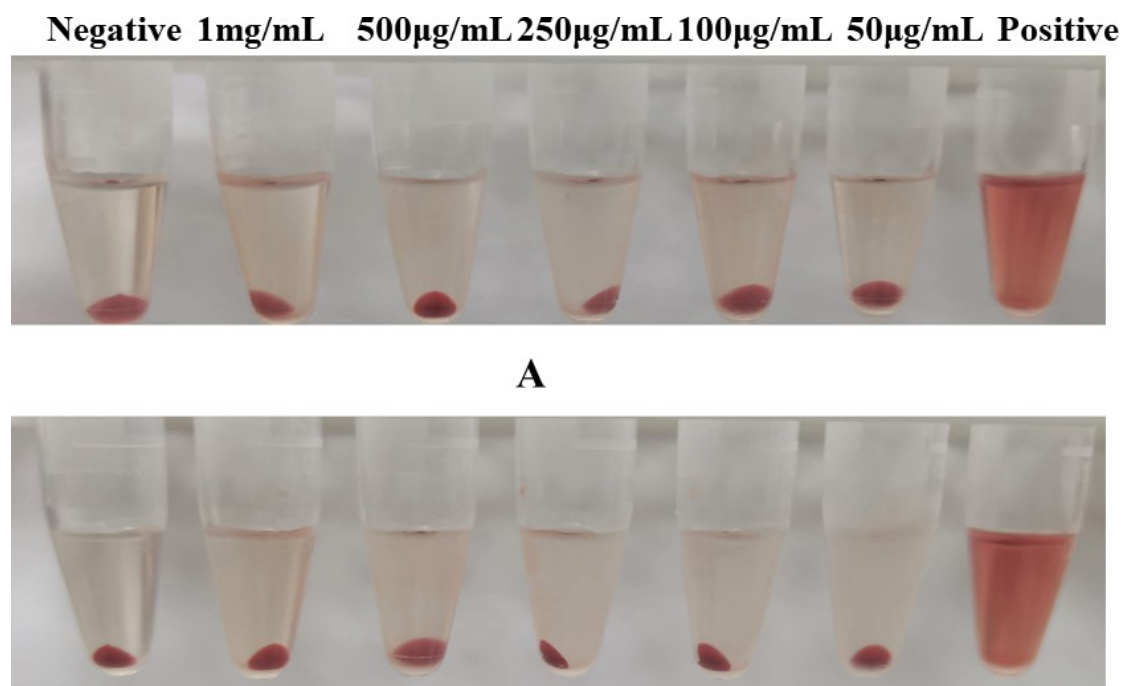

**Figure S4.** (A) Dex/PSB NPs, (B) Dex/PSB- $\gamma$ 3 NPs representative images of hemocompatibility assay.

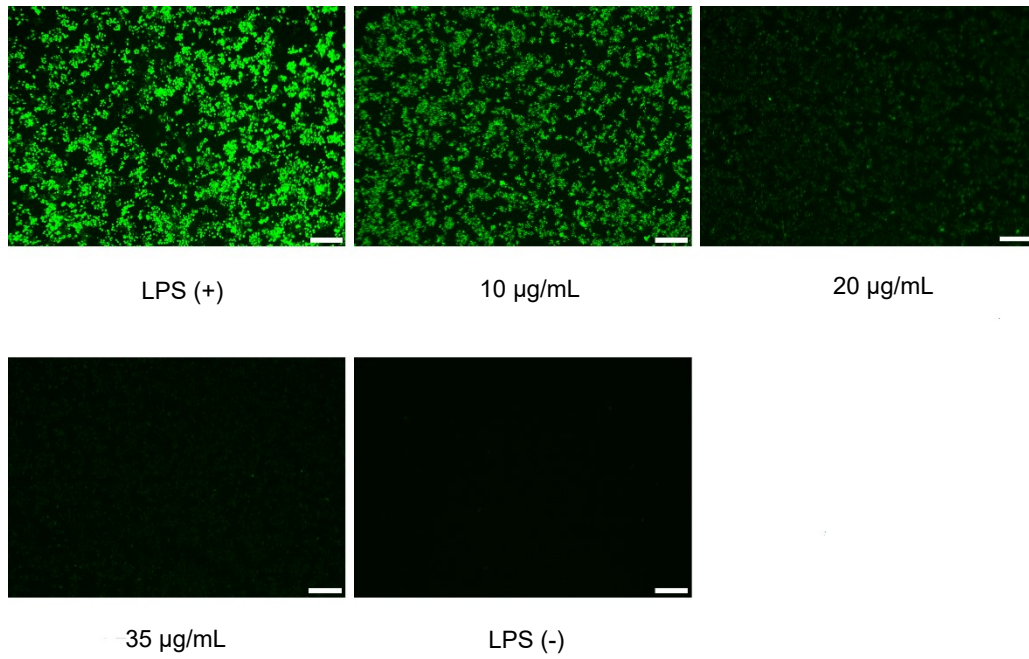

**Figure S5.** Representative fluorescent images of LPS-stimulated Raw 264.7 cells treated with different concentrations of Dex/PSB NPs. scale bar, 100 µm (n=3).

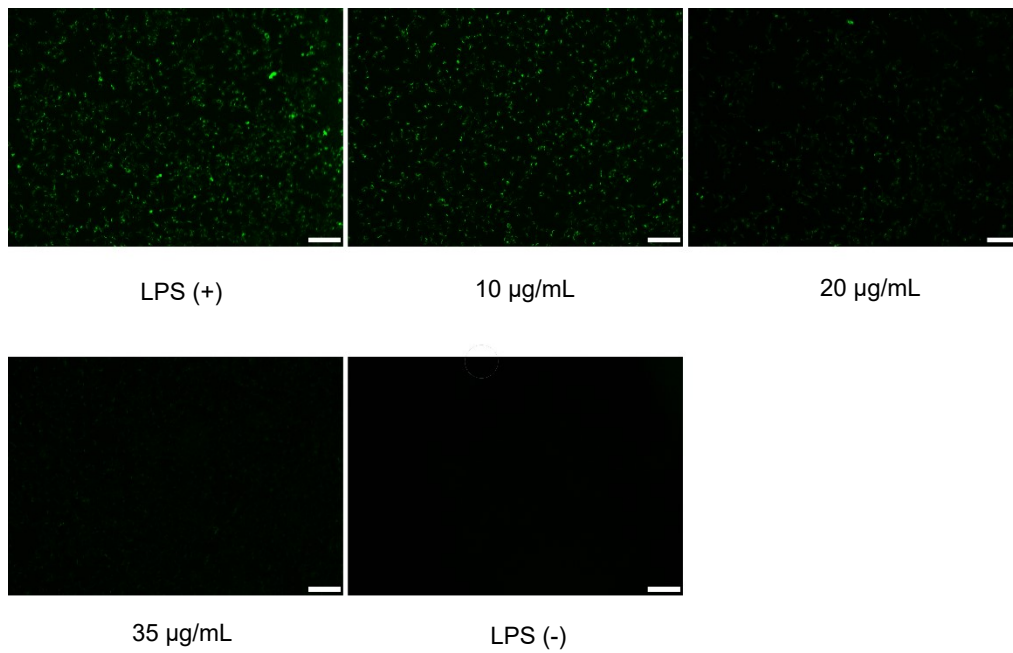

**Figure S6.** Representative fluorescent images of LPS-stimulated HUVEC cells treated with different concentrations of Dex/PSB NPs. scale bar, 100 µm (n=3).

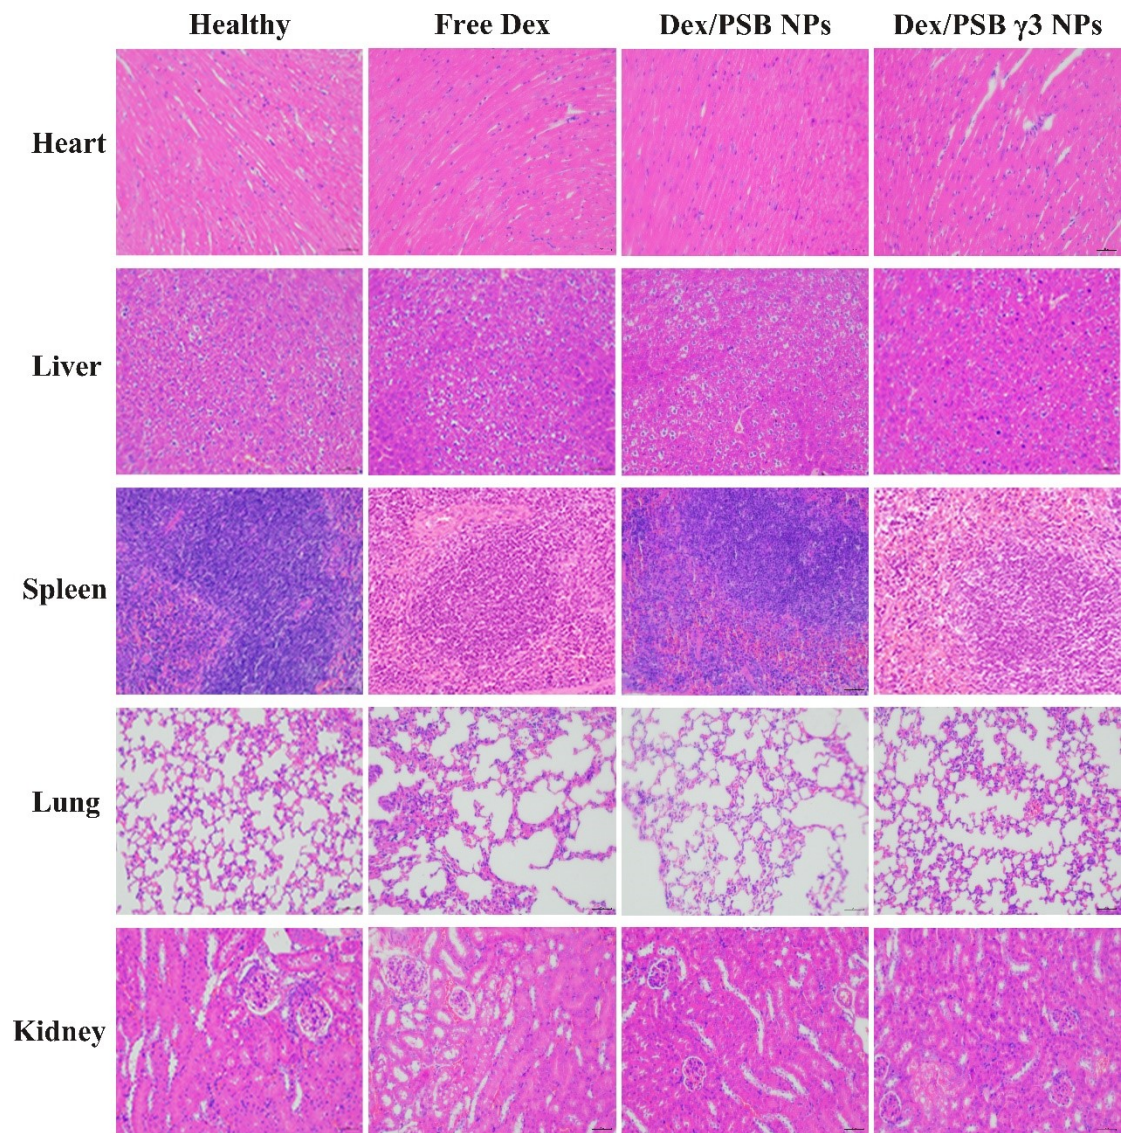

**Figure S7.** Representative images of organ tissue slices stained with H&E. Scale bar, 100  $\mu$ m.
